# Supplementary material for: Supramammillary glutamate neurons are a key node of the arousal system
Source: PubMed Central journal article supplement (PMC5680228; doi:10.1038/s41467-017-01004-6), 2017-11-10
Supplement: 41467_2017_1004_MOESM2_ESM.pdf [file 41467_2017_1004_MOESM2_ESM.pdf]

## **Description of Additional Supplementary Files**

File Name: Supplementary Movie 1

Descriptions: Active wake was noted for the following hours with a normal repertoire of behavior, but without the napping that is typical during the light period.
